# Supplementary material for: On the temperature dependence of the tilt and spontaneous polarisation in high tilt antiferroelectric liquid crystalsElectronic supplementary information (ESI) available: derivation of the expression for the free energy expansion in the biaxial SmC* phase. See http://www.rsc.org/suppdata/jm/b3/b314747a/
Source: Royal Society of Chemistry journal article supplement (doi:10.1039/b314747a), 2004-01-01
Supplement: b314747a.doc [file b314747a.doc]

**On the temperature dependence of the tilt and spontaneous polarisation in high tilt antiferroelectric liquid crystals.**

H F Gleeson*a[[1]](#footnote-2)*, Y Wang*a*, S Watson*a*, D Sahagun-Sanchez*a*, J W Goodby*b,* M Hird*b*, A. Petrenko*b* and M A Osipovc,

*a*The Department of Physics and Astronomy, The University of Manchester,

Manchester M13 9PL, UK

bThe School of Chemistry, The University of Hull, Hull, HU6 7RJ, UK

cThe Department of Mathematics, University of Strathclyde,

Glasgow G1 1XH, Scotland, UK

**Free energy expansion in the biaxial SmC* phase.**

It is well known that in the SmC* phase there exists a linear coupling between the tilt **w** and polarisation **P** determined by molecular chirality, where **w** is the pseudovector order parameter:

. (A1)

For small tilt angles  the free energy of the SmC* phase can be expanded in powers of **w** and **P**:

. (A2)

Here, is the free energy of the non-chiral SmC phase. Minimisation of the free energy (A2) with respect to polarisation yields:

, (A3)

where is the high temperature transverse dielectric susceptibility. One notes, however, that the simple equation (A3) is valid only for small tilt angles . If ** is not small, one has to take into account higher order terms in the free energy expansion including, for example, the coupling between **P** and **w**3 which can be written as . Taking into account this term, equation (A2) is rewritten as,

. (A4)

The Sm C phase is biaxial and thus the free energy should also depend on the biaxial order parameter *B* which is given by the following general equation:

, (A5)

where the unit vectors **b** and **c** (**b.c** = 0) are in the direction of short molecular axes, the unit vector is parallel to **w** and the unit vector **m** is perpendicular to both **w** and **n**. Here *B* is the scalar biaxial order parameter and the order parameter *C* describes the tendency of short molecular axes to order along the director. One notes that in the limit of perfect nematic order and .

Now the free energy of the SmC* phase can be expanded in powers of the primary order parameter **w** and the secondary order parameters **P** and *B*taking into account all coupling terms of the lowest order:

(A6)

where we have neglected all terms of the order  and higher.

One notes that in equation (6) the coefficients ,  and which represent the coupling between polarisation and the tilt, are determined by molecular chirality and, therefore, are expected to be relatively small. By contrast, coefficients *G* and  which represent a coupling between the biaxial ordering and tilt, and between bixial ordering and polarisation, respectively, are not related to molecular chirality and may be of the same order as other Landau coefficients. The coefficient in the quadratic term in *B* is assumed to be temperature dependent, where is the virtual temperature of the transition into the biaxial Sm A phase. Taking into account equations (1), (3) and (5) the free energy (6) can be rewritten in terms of the scalar order parameters *, P* and *C*.

(A7)

Minimisation of the free energy (A7) with respect to *P* and *B* yields:

, (A8)

and

. (A9)

It is reasonable to assume that the chirality of the SmC* phase does not have a strong effect on the value of the biaxial order parameter *C*. The last two terms in brackets in equation (A9) vanish in a nonchiral Sm C phase, and we neglect them in the first approximation. Then,

. (A10)

The temperature is assumed to sufficiently low, and therefore one may assume that the current temperature *T* in the SmC* phase is far from . Then equation (A10) can be expanded as

, (A11)

where,

. (a12)

Here the temperature is equal to the SmA - SmC transition temperature in the case of the first order phase transition.

Substituting equation (10) into equation (8) and expanding similar to equation (11) one obtains the approximate expression for the spontaneous polarisation for :

, (A13)

where

(A14)

and

, (A15)

where *B0* is given by equation (A12).

1.  Author for correspondence. E-mail Helen.Gleeson@man.ac.uk [↑](#footnote-ref-2)
